# Supplementary material
Source: MDPI journal article supplement (https://www.mdpi.com/2072-4292/15/19/4762)
Supplement: s1 [file s1]

## Supplementary Materials

**Supplementary Table S1:** SWAT parameters applied for calibration in this study.

| S. No. | Parameter    | Method   | Description                                                                            | Range        |
|--------|--------------|----------|----------------------------------------------------------------------------------------|--------------|
| 1      | GW_DELAY.gw  | Replace  | Groundwater delay (days)                                                               | 0 – 500      |
| 2      | GW_REVAP.gw  | Replace  | Groundwater "revap" coefficient                                                        | 0.02 – 0.2   |
| 3      | REVAPMN.gw   | Replace  | Threshold depth of water in the shallow aquifer for "revap" to occur (mm)              | 0 – 100      |
| 4      | GWQMN.gw     | Replace  | Threshold depth of water in the shallow aquifer required for return flow to occur (mm) | 0 – 5000     |
| 5      | ALPHA_BF.gw  | Replace  | Baseflow alpha factor (days)                                                           | 0 – 1        |
| 6      | CH_K2.rte    | Replace  | Effective hydraulic conductivity in main channel alluvium                              | 0 – 500      |
| 7      | CH_N2.rte    | Replace  | Manning's "n" value for the main channel                                               | 0 – 0.3      |
| 8      | CANMX.hru    | Replace  | Maximum canopy storage                                                                 | 0 – 100      |
| 9      | HRU_SLP.hru  | Relative | Average slope steepness                                                                | –0.25 – 0.25 |
| 10     | SLSUBBSN.hru | Relative | Average slope length                                                                   | –0.25 – 0.25 |
| 11     | OV_N.hru     | Replace  | Manning's "n" value for overland flow                                                  | 0.01 – 30    |
| 12     | CN2.mgt      | Relative | SCS runoff curve number f                                                              | –0.25 – 0.25 |
| 13     | BIOMIX.mgt   | Replace  | Biological mixing coefficient                                                          | 0 – 1        |
| 14     | SFTMP.bsn    | Replace  | Snowfall temperature                                                                   | –20 – 20     |
| 15     | SMTMP.bsn    | Replace  | Snowmelt base temperature                                                              | –20 – 20     |
| 16     | SMFMX.bsn    | Replace  | Maximum melt rate for snow during the year (occurs on the summer solstice)             | 0 – 20       |
| 17     | SMFMN.bsn    | Replace  | Minimum melt rate for snow during the year (occurs on winter solstice)                 | 0 – 20       |
| 18     | TIMP.bsn     | Replace  | Snowpack temperature lag factor                                                        | 0 – 1        |
| 19     | ESCO.bsn     | Replace  | Soil evaporation compensation factor                                                   | 0 – 1        |
| 20     | SNOCVMX.bsn  | Replace  | Minimum snow water content that corresponds to 100% snow cover                         | 0 – 15       |
| 21     | EPCO.bsn     | Replace  | Plant uptake compensation factor                                                       | 0 – 1        |

|    |                |          |                                                             |              |
|----|----------------|----------|-------------------------------------------------------------|--------------|
| 22 | SNO50COV.bsn   | Replace  | Snow water equivalent that corresponds to<br>50% snow cover | 0.05 – 0.8   |
| 23 | SURLAG.bsn     | Replace  | Surface runoff lag time                                     | 0.05 – 24    |
| 24 | TLAPS.sub      | Replace  | Temperature lapse rate                                      | –10 – 10     |
| 25 | PLAPS.sub      | Replace  | Precipitation lapse rate                                    | –1000 – 1000 |
| 26 | SOL_ALB(.).sol | Relative | Moist soil albedo                                           | 0 – 0.25     |
| 27 | SOL_AWC(.).sol | Relative | Available water capacity of the soil layer                  | –0.25 – 0.25 |
| 28 | SOL_K(.).sol   | Relative | Saturated hydraulic conductivity                            | –0.25 – 0.25 |
| 29 | SOL_Z(.).sol   | Relative | Depth from the soil surface to the bottom of<br>the layer   | –0.5 – 0.5   |
